# Supplementary material
Source: PubMed Central journal article supplement (PMC7182752)

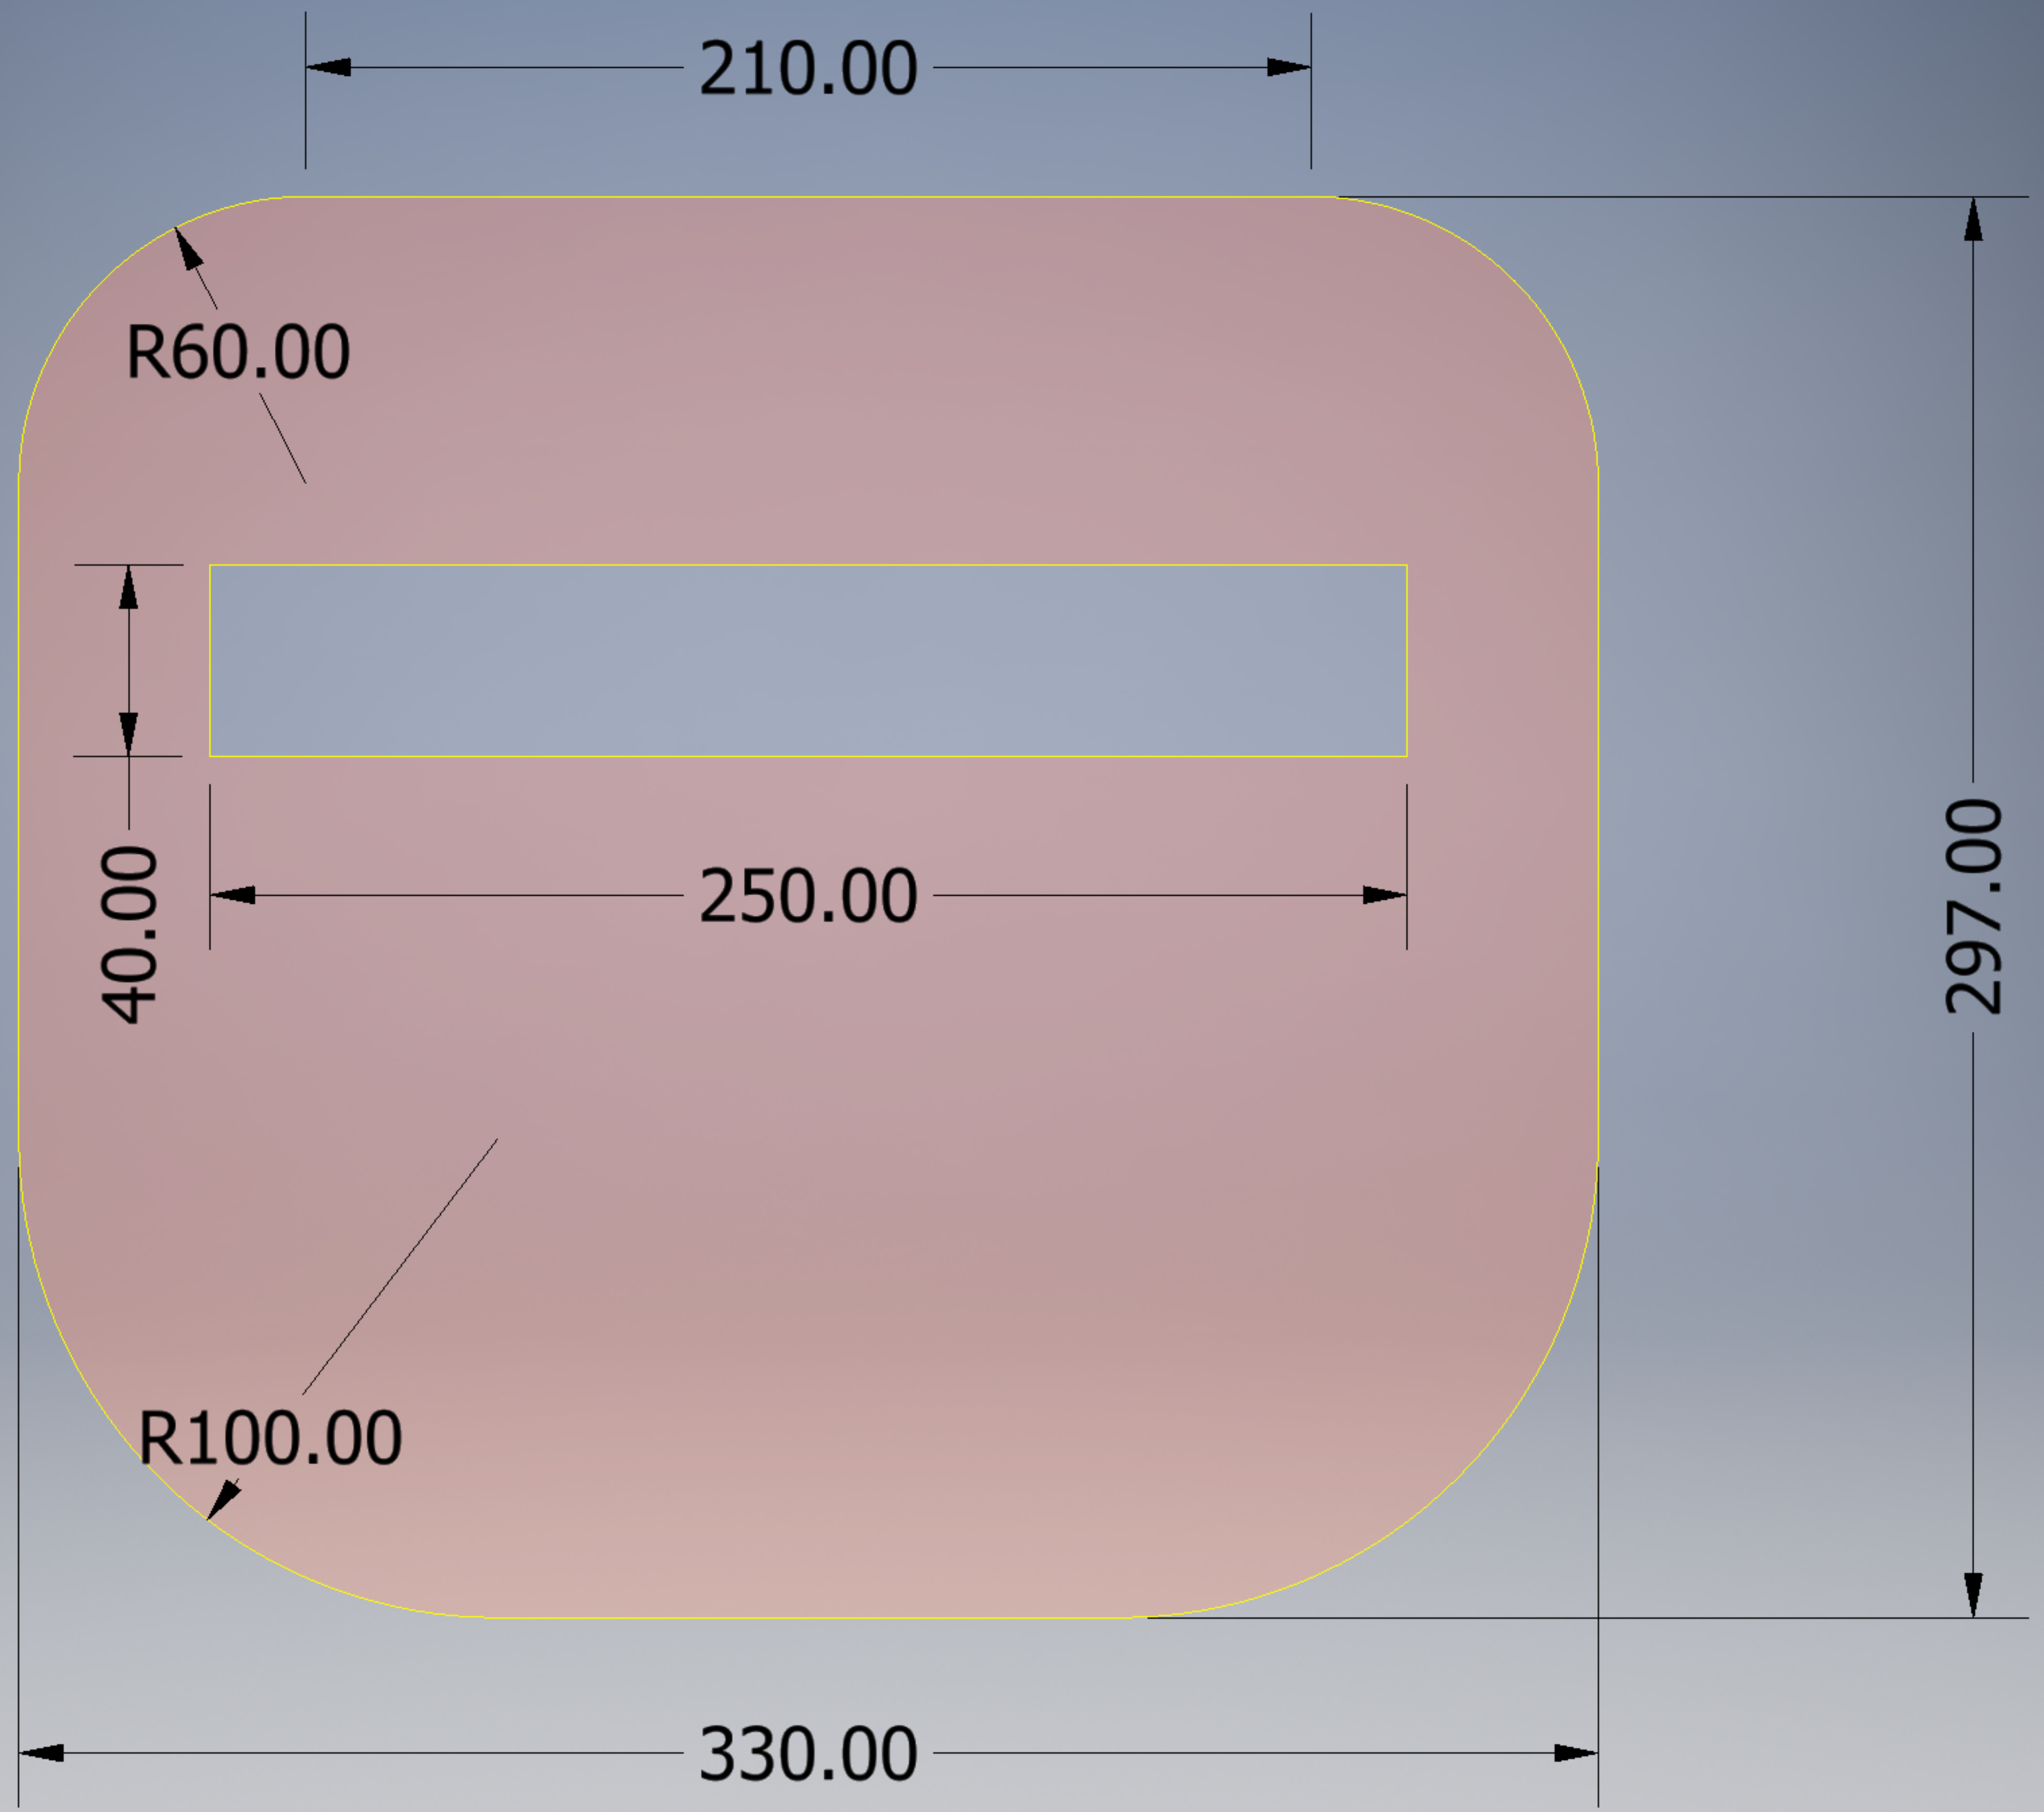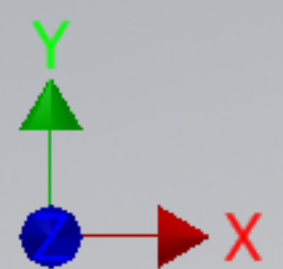

Supplement: mmc3.pdf [file mmc3.pdf]
